# Supplementary material for: Active nuclear transcriptome analysis reveals inflammasome-dependent mechanism for early neutrophil response to Mycobacterium marinum
Source: PubMed Central journal article supplement (PMC5529371; doi:10.1038/s41598-017-06099-x), 2017-07-26

**Active nuclear transcriptome analysis reveals inflammasome-dependent  
mechanism for early neutrophil response to *Mycobacterium marinum***

Amy Kenyon<sup>1,2</sup>, Daria Gavriouchkina<sup>1</sup>, Jernej Zorman<sup>1</sup>, Giorgio Napolitani<sup>2</sup>, Vincenzo  
Cerundolo<sup>2</sup> and Tatjana Sauka-Spengler<sup>1,§</sup>

## **Supporting Information**

### **Figure S1: Generation of BirA driver line**

**A.** Schematic of the *mpo* BAC donor construct, containing HA-tagged BirA (orange), a ribosomal skipping motif - 2A (grey), citrine reporter (green), polyA tail (white), followed by FRT recombination sites (turquoise) flanking a kanamycin selection cassette. Ampicillin selection cassette, not amplified as a part of recombination cassette, is used as a selection marker for *E. coli* during plasmid DNA isolation. Red arrows indicate position of primers used for amplification and recombination into the *mpo* BAC. **B.** Schematic of *mpo* modified BAC DNA with HA-tagged BirA (orange), a ribosomal skipping motif - 2A (grey), citrine reporter (green), polyA tail (white), followed by the remaining FRT sites (turquoise) recombined into the first exon, with a BAC-specific ampicillin-Tol2 cassette (iTol2) in pink and yellow.

### **Figure S2: Technical reproducibility of replicates**

**A.** Scatterplot of log<sub>2</sub> fold differences between biological duplicates for representative neutrophil nuclear samples  $-Mm$  vs  $-Mm$  (i),  $+Mm$  vs  $+Mm$  (ii) and  $+Mm$  vs  $-Mm$  (iii). **B.** Table presenting Pearson correlation coefficients to all possible pairwise comparisons of replicates/samples.

### **Figure S3: sgRNA-mediated gene knockdown of *wu:fb15h11***

**A.** *Wu:fb15h11* sgRNA tests for efficiency in inducing DNA double-strand breaks. SgRNAs were injected into the 1-cell stage and genomic DNA extracted at 24 hpf. High resolution melting curves from 3-4 individual embryos injected either with Cas9 mRNA only (green) or co-injected with Cas9 mRNA and *wu:fb15h11* sgRNA (red) are shown.

### **Figure S4: Enumeration of neutrophil numbers following caspase b knockdown**

**A.** Bar graph representing neutrophil numbers counted on days 2 - 5, following injection of *M. marinum* at the 32-512 cell stage into control (injected with Cas9 mRNA only) or caspase b knockout embryos (co-injected with caspase b sgRNAs and Cas9 mRNA).

**Figure S5: sgRNA-mediated gene knockdown of junbb**

**A.** *junbb* sgRNA tests for efficiency in inducing DNA double-strand breaks. High resolution melting curves from 3-4 individual embryos injected either with cas9 mRNA only (green) or co-injected with Cas9 mRNA and *junbb* sgRNA (red) are shown. **B.** Bar graph representing il1 $\beta$  mRNA levels measured at 3 dpi by qPCR. Statistical significance was determined by two-tailed unpaired students t-test with Welch's correction. Wildtype fish were co-injected with cas9 mRNA and 3 sgRNAs for targeted knockout of *junbb* or Cas9 mRNA only at the one cell stage, followed by injection of *M. marinum* at the 32-512 cell stage.

**Supplemental data - Primers**

| Primers for in situ probes synthesis | Sequence                                  |
|--------------------------------------|-------------------------------------------|
| 5' junbb sp6 sense                   | GATTTAGGTGACACTATAGAAAATGGAGCAGCCGTTTTA   |
| 3' junbb t7 antisense                | TAATACGACTCACTATAGGGAAACGCCTCCATCTTACTGG  |
| 5' hbegfa sp6 sense                  | GATTTAGGTGACACTATAGGAGTCTCGGAGGGATTACTTTT |
| 3' hbegfa t7 antisense               | TAATACGACTCACTATAGGGGCTCTCCTGCGAACTTCTTT  |
| 5' il1b sp6 sense                    | GATTTAGGTGACACTATAGGCAGAGGAACTTAACCAGCTC  |
| 3' il1b t7 antisense                 | TAATACGACTCACTATAGGG CGCACTTTATCCTGCAGCTC |

|                           |                                                 |
|---------------------------|-------------------------------------------------|
| 5' il8L1 sp6 sense        | GATTTAGGTGACACTATAGCTCCACACACACCCGGCTTC         |
| 3' il8L1 T7 antisense     | TAATACGACTCACTATAGGGTTTTATTAATCATACAAGCAGATGTCA |
| 5' egr3 sp6 sense         | GATTTAGGTGACACTATAGGCGGACAAGATCCCTATTACC        |
| 3' egr3 T7 antisense      | TAATACGACTCACTATAGGGAGATGGTCACTGCGACTGAA        |
| 5' egr4 sp6 sense         | GATTTAGGTGACACTATAGCTGAACACCGTGGACTTCAG         |
| 3' egr4 T7 antisense      | TAATACGACTCACTATAGGGCGCGCTGTTGAGGTGAAC          |
| 5' ier2 sp6 sense         | GATTTAGGTGACACTATAGTGAATGAAACCACGGTGAAAGT       |
| 3' ier2 T7 antisense      | TAATACGACTCACTATAGGGTGTGGATTCTTCAGCAAGTGA       |
| 5' tnfb sp6 sense         | GATTTAGGTGACACTATAGGCAGCATGGTGAGATACGAA         |
| 3' tnfb t7 antisense      | TAATACGACTCACTATAGGGCGTCACATTAGCTTGCGATAA       |
| 5' cepbp sp6 sense        | GATTTAGGTGACACTATAGGTATGCAAGCAGCCAGTCAA         |
| 3' cepbp t7 antisense     | TAATACGACTCACTATAGGGCAATCGACGGCAGAAACTT         |
| 5' fosl1a sp6 sense       | GATTTAGGTGACACTATAGAGAAAGCAGCTCTGGATCGT         |
| 3' fosl1a t7 antisense    | TAATACGACTCACTATAGGGGGGTGAGGATTGTGGGTGAA        |
| 5' junba sp6 sense        | GATTTAGGTGACACTATAGACTCGTTTCTTTCTGCTTATGGT      |
| 3' junba t7 antisense     | TAATACGACTCACTATAGGGAAACGACTTGATCTTGGGCG        |
| 5' caspase b sp6 sense    | GATTTAGGTGACACTATAGTGATGTGCTCGAGGATCTTG         |
| 3' caspase b t7 antisense | TAATACGACTCACTATAGGGCCCTCGATTGGATTCTGTA         |

|                            |                                           |
|----------------------------|-------------------------------------------|
| 5' wu:fb15h11 sp6 sense    | GATTTAGGTGACACTATAGAGCTGGAGACGACAATGAAGA  |
| 3' wu:fb15h11 t7 antisense | TAATACGACTCACTATAGGGTGAGGGAAAAAGAGCTGAAGA |

| Primers for sgRNA synthesis | Sequence                                                                 |
|-----------------------------|--------------------------------------------------------------------------|
| caspase b 1                 | GAAATTAATACGACTCACTATAGGG TGACAATAAAGATGCCATTGT GTTTTA<br>GAGCTAGAAATAGC |
| caspase b 2                 | GAAATTAATACGACTCACTATAGG GGAGTGGCTGCTGAGATCTCGTTTTA<br>GAGCTAGAAATAGC    |
| caspase b 3                 | GAAATTAATACGACTCACTATAGG GTTTCGGTTGTGTTGTGTAT GTTTTA<br>GAGCTAGAAATAGC   |
| wu:fb15h11 1                | GAAATTAATACGACTCACTATAGG GCTGAAGAGAAGGAGAATC GTTTTA<br>GAGCTAGAAATAGC    |
| wu:fb15h11 2                | GAAATTAATACGACTCACTATAGG GCTTCCCTTAAATTCAGA GTTTTA<br>GAGCTAGAAATAGC     |
| wu:fb15h11 3                | GAAATTAATACGACTCACTATAGG GGGACGAGATCTGCTGCTGC GTTTTA<br>GAGCTAGAAATAGC   |
| junbb 1                     | GAAATTAATACGACTCACTATAGG<br>GCATCAAGGCGGAACGCAAGGTTTTAGAGCTAGAAATAGC     |
| junbb 2                     | GAAATTAATACGACTCACTATAGG GCAAAC TAGAACGCATCGCG GTTTTA<br>GAGCTAGAAATAGC  |
| junbb 3                     | GAAATTAATACGACTCACTATAGGGAACTCAAGCAGAAGGTCCTG GTTTTA<br>GAGCTAGAAATAGC   |

|        |                                                                                    |
|--------|------------------------------------------------------------------------------------|
| egr3 1 | <b>GAAATTAATACGACTCACTATAGGGTCCGGCCGAGAACTGTGACGTTTTA</b><br><b>GAGCTAGAAATAGC</b> |
| egr3 2 | <b>GAAATTAATACGACTCACTATAGGGCGATCCGATGAGTTGACGTTTTA</b><br><b>GAGCTAGAAATAGC</b>   |
| egr3 3 | <b>GAAATTAATACGACTCACTATAGGGTCCAGTGCCGCATCTGCATGTTTTA</b><br><b>GAGCTAGAAATAGC</b> |

Active nuclear transcriptome analysis reveals inflammasome-dependent mechanism for early neutrophil response to *Mycobacterium marinum*

Supplementary Figure 1

A i)

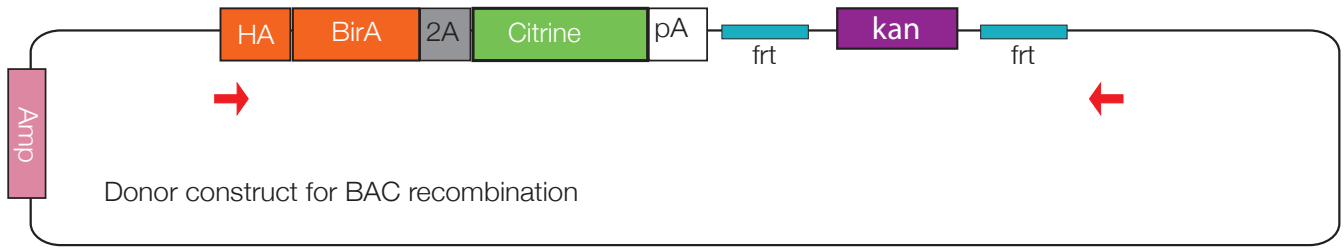

ii)

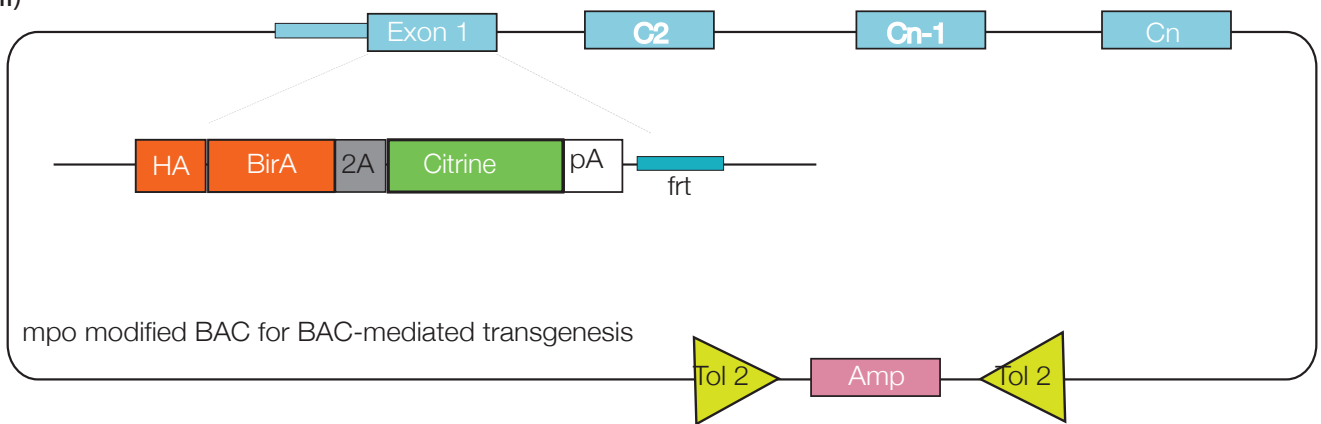

Supplementary Figure 2

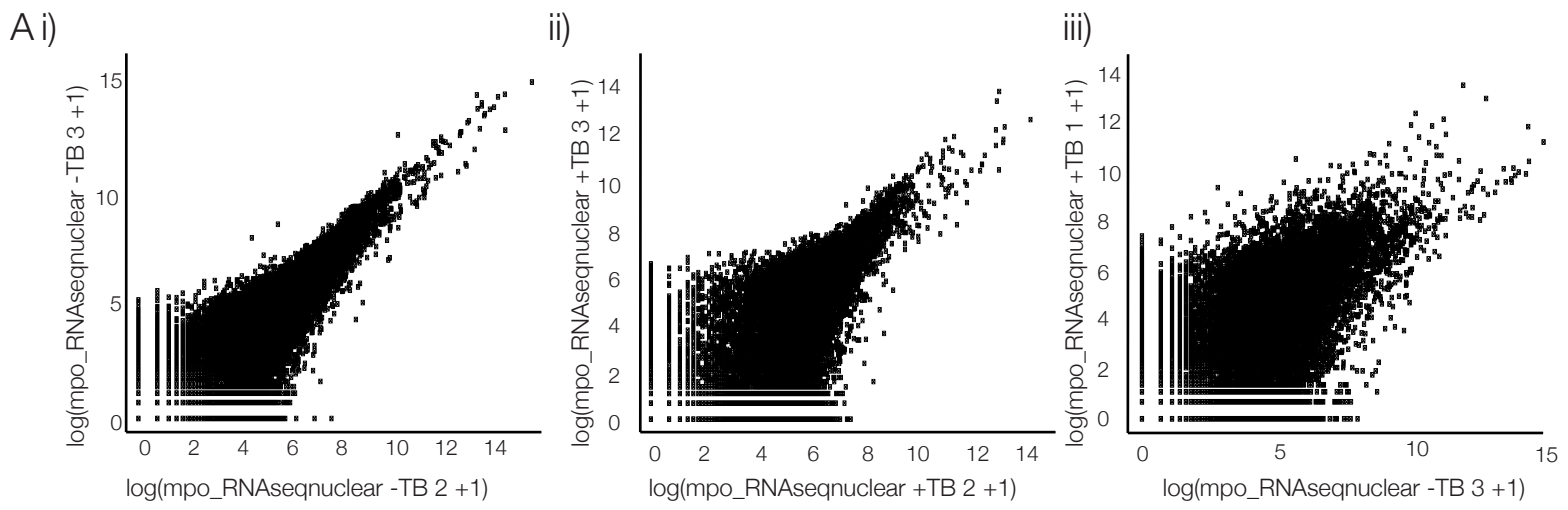

B

| Pearson    | mpo + TB 1 | mpo + TB 2 | mpo + TB 3 | mpo - TB 1 | mpo - TB 2 | mpo - TB 3 |
|------------|------------|------------|------------|------------|------------|------------|
| mpo + TB 1 | 1          | 0.8675646  | 0.8342894  | 0.8298012  | 0.8187772  | 0.7828011  |
| mpo + TB 2 | -          | 1          | 0.8922661  | 0.8439331  | 0.8866421  | 0.8408514  |
| mpo + TB 3 | -          | -          | 1          | 0.776431   | 0.765863   | 0.7593172  |
| mpo - TB 1 | -          | -          | -          | 1          | 0.8292914  | 0.7776135  |
| mpo - TB 2 | -          | -          | -          | -          | 1          | 0.7731537  |
| mpo - TB 3 | -          | -          | -          | -          | -          | 1          |



A

Wu:fb15h11

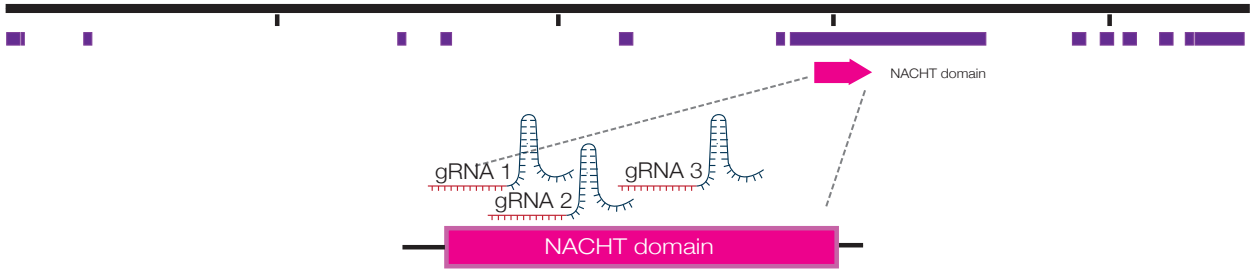

wu:fb15h11 sgRNA 1

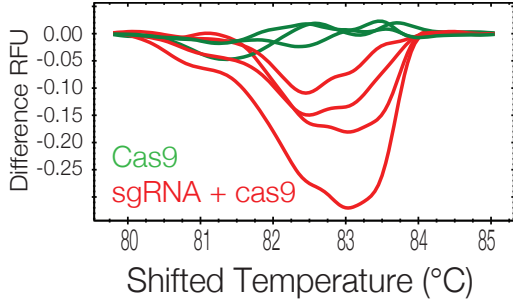

wu:fb15h11 sgRNA 2

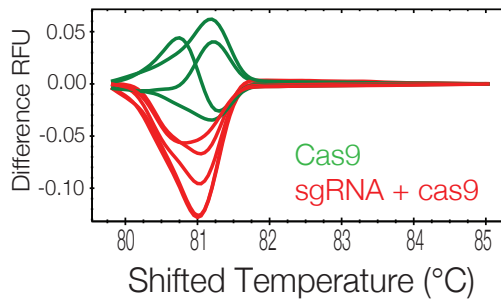

wu:fb15h11 sgRNA 3

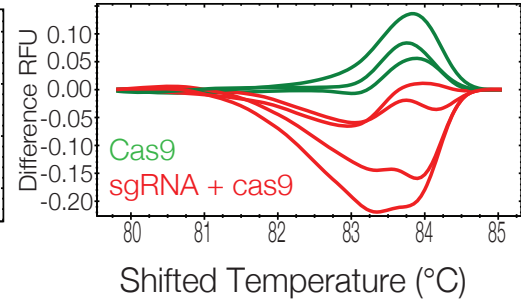

Supplementary Figure 4

A

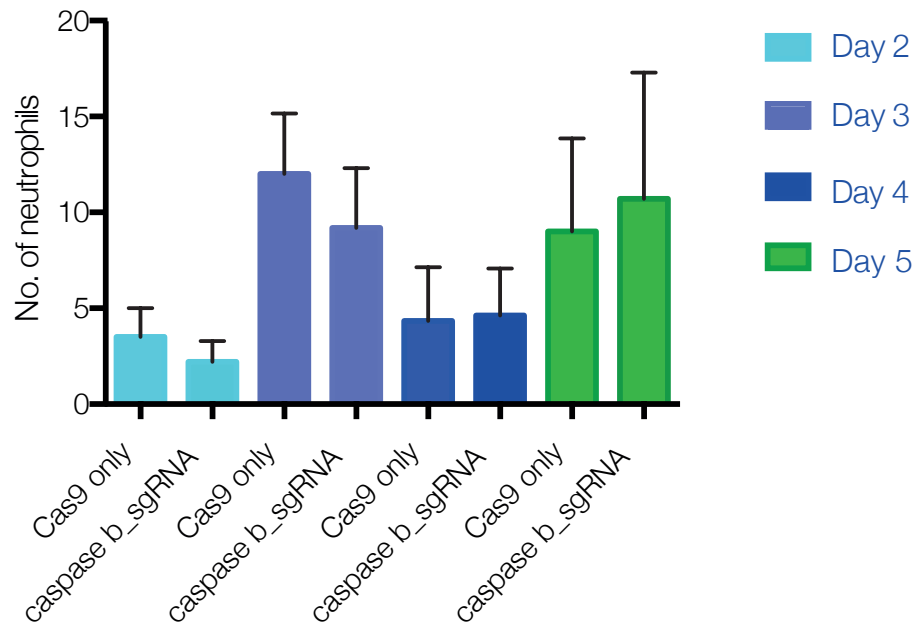

A

Junbb

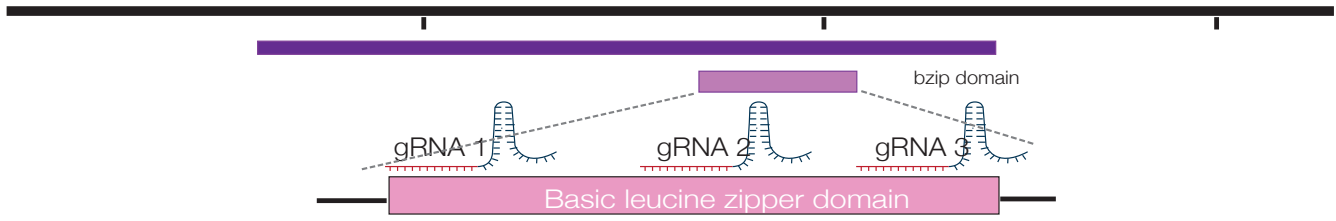

Junbb guide 1

Junbb guide 2

Junbb guide 3

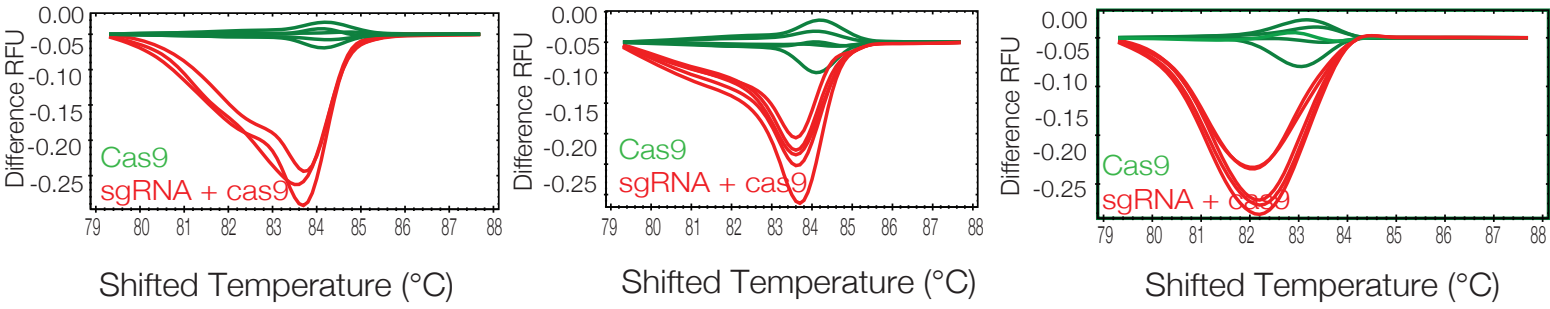

B

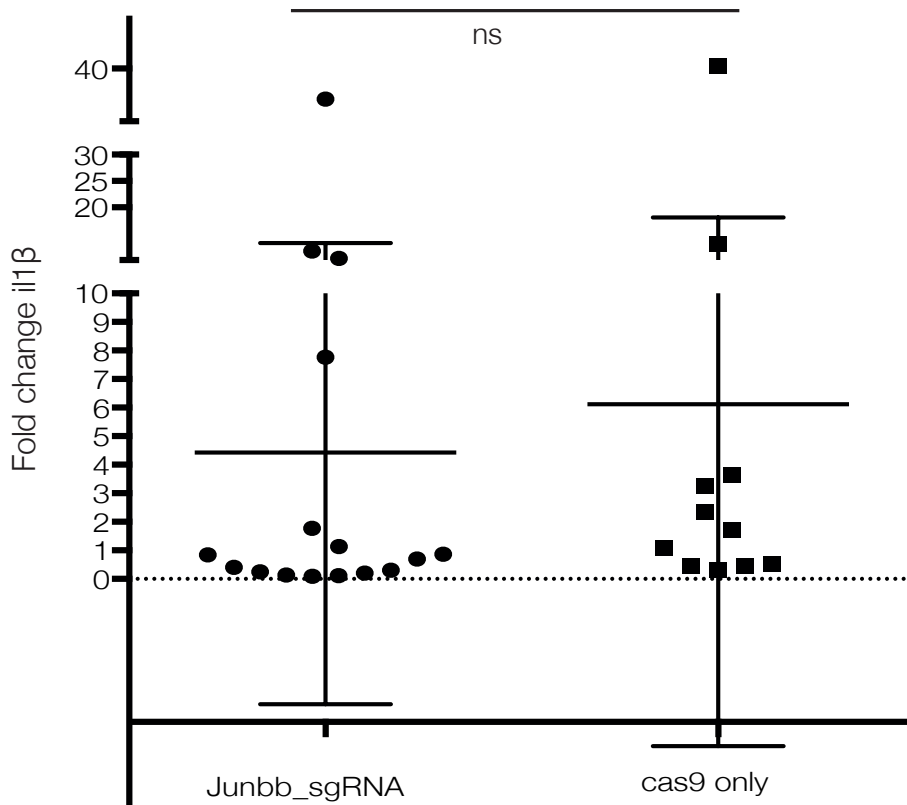

Supplement: 41598_2017_6099_MOESM1_ESM.pdf [file 41598_2017_6099_MOESM1_ESM.pdf]
